# Supplementary material for: Crystal facet and Na-doping dual engineering ultrathin BiOCl nanosheets with efficient oxygen activation for enhanced photocatalytic performance
Source: Royal Society of Chemistry journal article supplement (doi:10.1039/d2ra08003f), 2023-01-01
Supplement: d2ra08003f1.pdf [file d2ra08003f1.pdf]

1

2

## Supporting Information

3

**Crystal facet and Na-doping dual engineering of bismuth**

4

**oxychloride ultrathin nanosheets with efficient oxygen activation**

5

**for enhanced photocatalytic performance**

6 Kunyu Chen <sup>a</sup>, Yiwei Huang <sup>a</sup>, Meina Huang <sup>c</sup>, Yanqiu Zhu <sup>a,d</sup>, Ming Tang <sup>a</sup>, Renjie Bi <sup>a</sup>,

7 Meiping Zhu <sup>a,b\*</sup>

8 <sup>a</sup> *State Key Laboratory of Featured Metal Materials and Life-cycle Safety for Composite Structures, School*  
9 *of Resources, Environment and Materials; Guangxi Institute Fullerene Technology (GIFT), Guangxi*  
10 *University, Nanning 530004, P. R. China*

11 <sup>b</sup> *Guangxi Key Laboratory of Petrochemical Resource Processing and Process Intensification Technology,*  
12 *Guangxi University, Nanning 530004, P. R. China*

13 <sup>c</sup> *College of Materials and New Energy, South China Normal University, Shanwei 516625, P. R. China*

14 <sup>d</sup> *College of Engineering, Mathematics and Physical Sciences, University of Exeter, Exeter, EX4 4QF,*  
15 *United Kingdom*

16 \* Corresponding author at:

17 Guangxi Key Laboratory of Processing for Non-ferrous Metals and Featured Materials & MOE Key  
18 Laboratory of New Processing Technology for Non-ferrous Metals and Materials, School of Resources,  
19 Environment and Materials; Guangxi Institute Fullerene Technology (GIFT), Guangxi University, Nanning  
20 530004, P. R. China

21 *E-mail address:* [meipingzhu@gxu.edu.cn](mailto:meipingzhu@gxu.edu.cn) (M. Zhu)

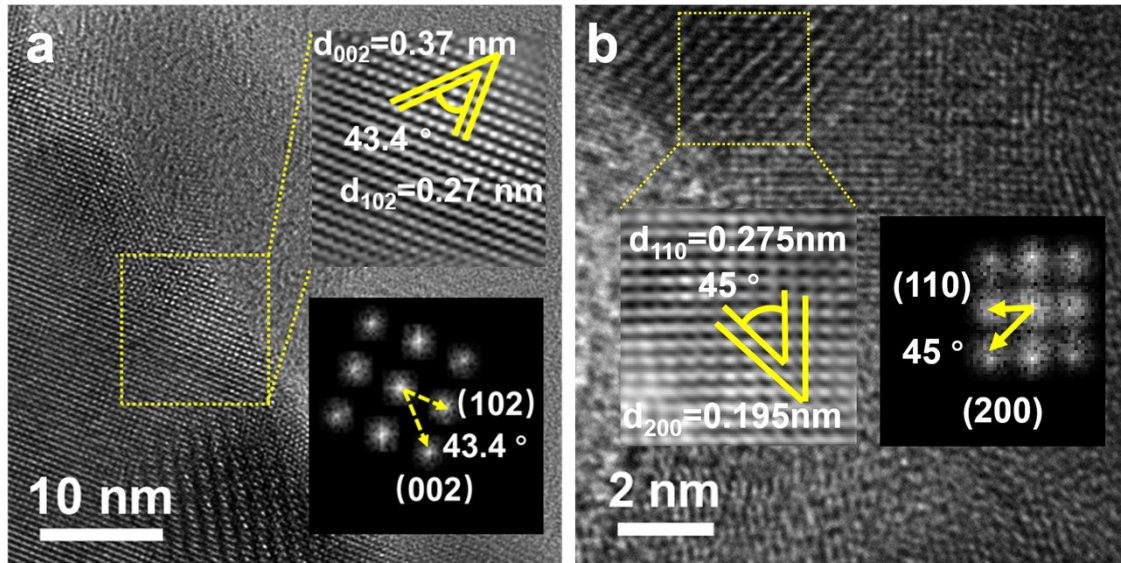

22

23 **Fig. S1.** HRTEM images with enlarged view (inset) and SAED patterns (inset) of (a) BOC-  
 24 010 and (b) BOC-001.

25

26

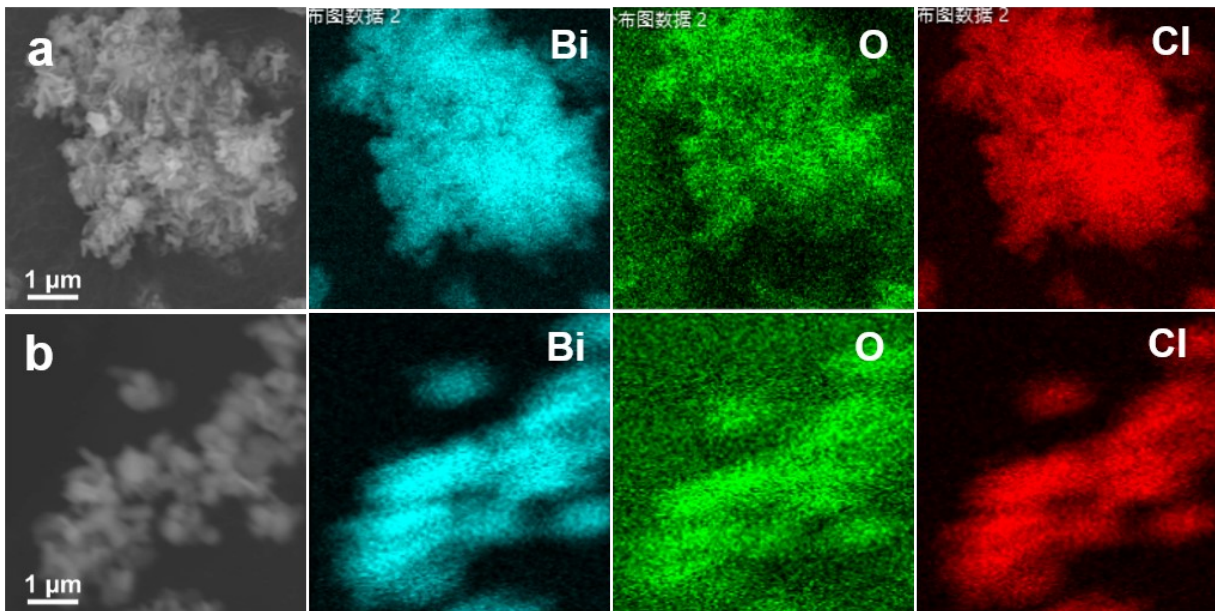

27

28 **Fig. S2.** SEM images and corresponding EDS elemental mapping of (a) BOC-010 and (b)  
 29 BOC-001.

30

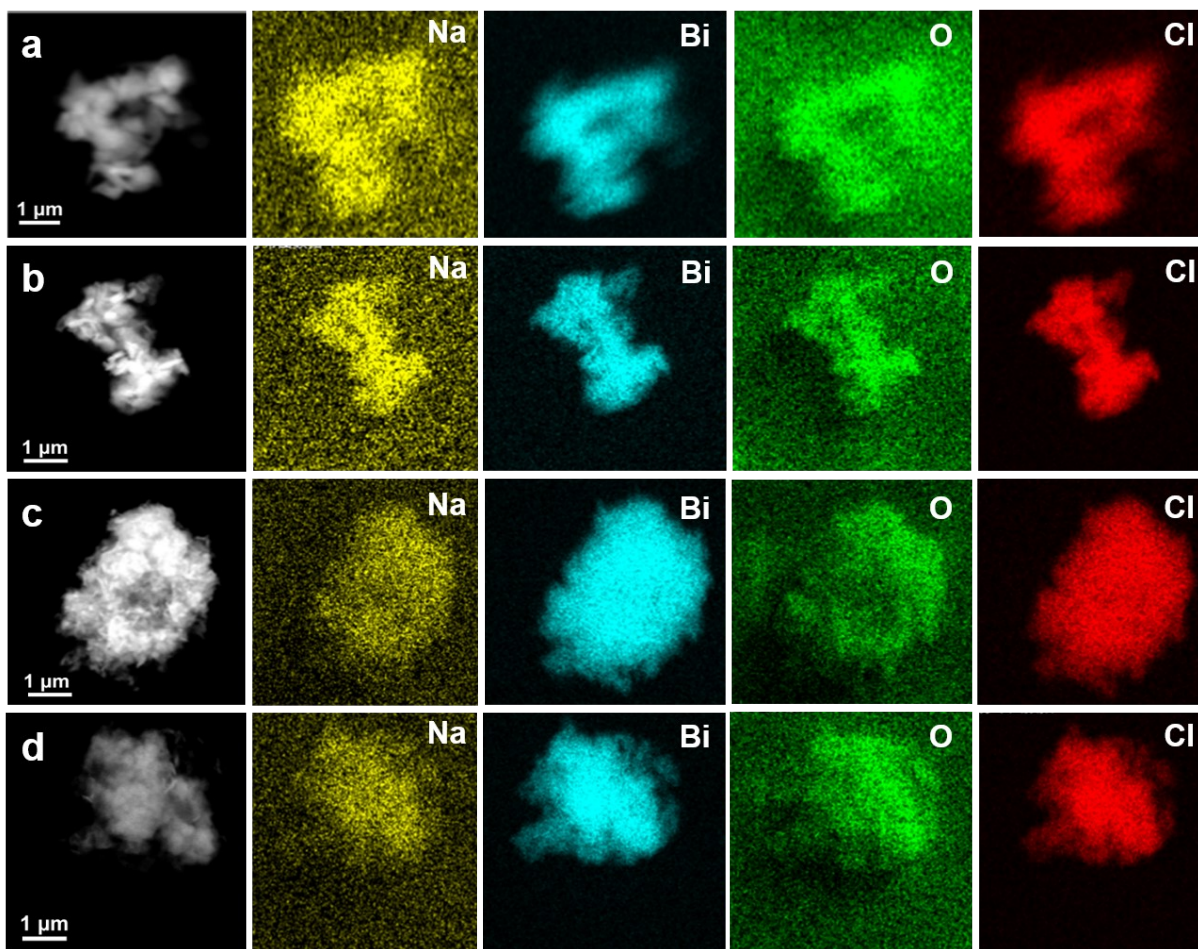

31

32 **Fig. S3.** SEM images and corresponding EDS elemental mapping of (a) 0.50-Na-BOC-010, (b)  
 33 0.15-Na-BOC-001, (c) 0.35-Na-BOC-001 and (d) 0.60-Na-BOC-001.

34

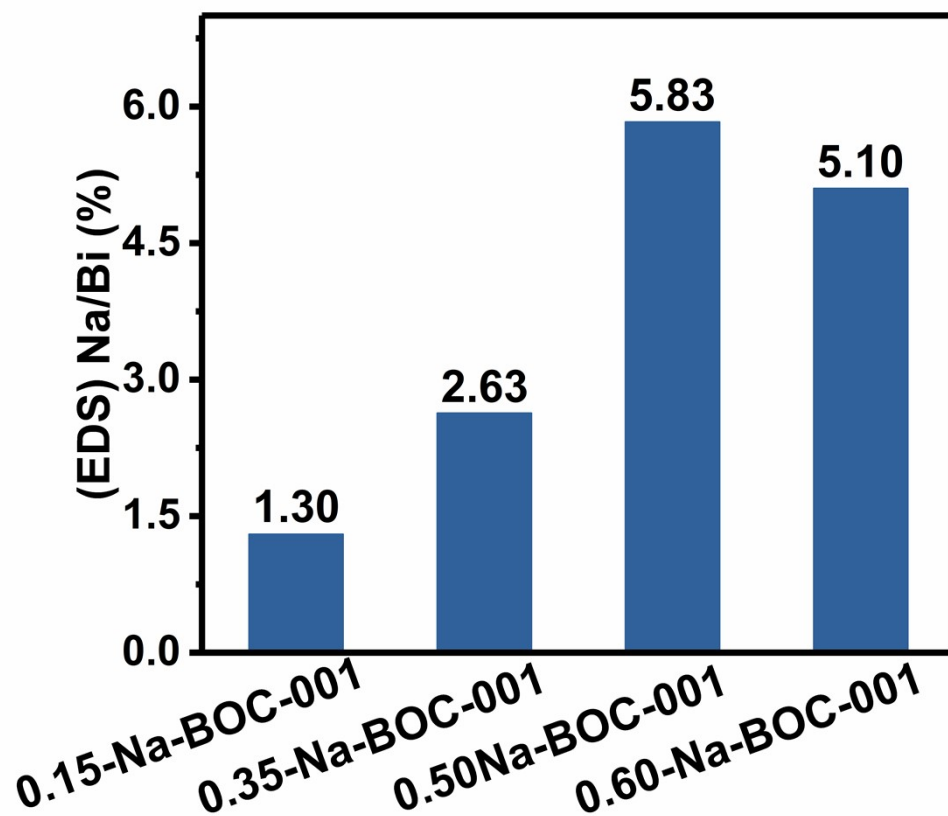

35

36 **Fig. S4.** (EDS) Na/Bi ratio of 0.15-Na-BOC-001, 0.35-Na-BOC-001, 0.50-Na-BOC-001 and

37

0.60-Na-BOC-001.

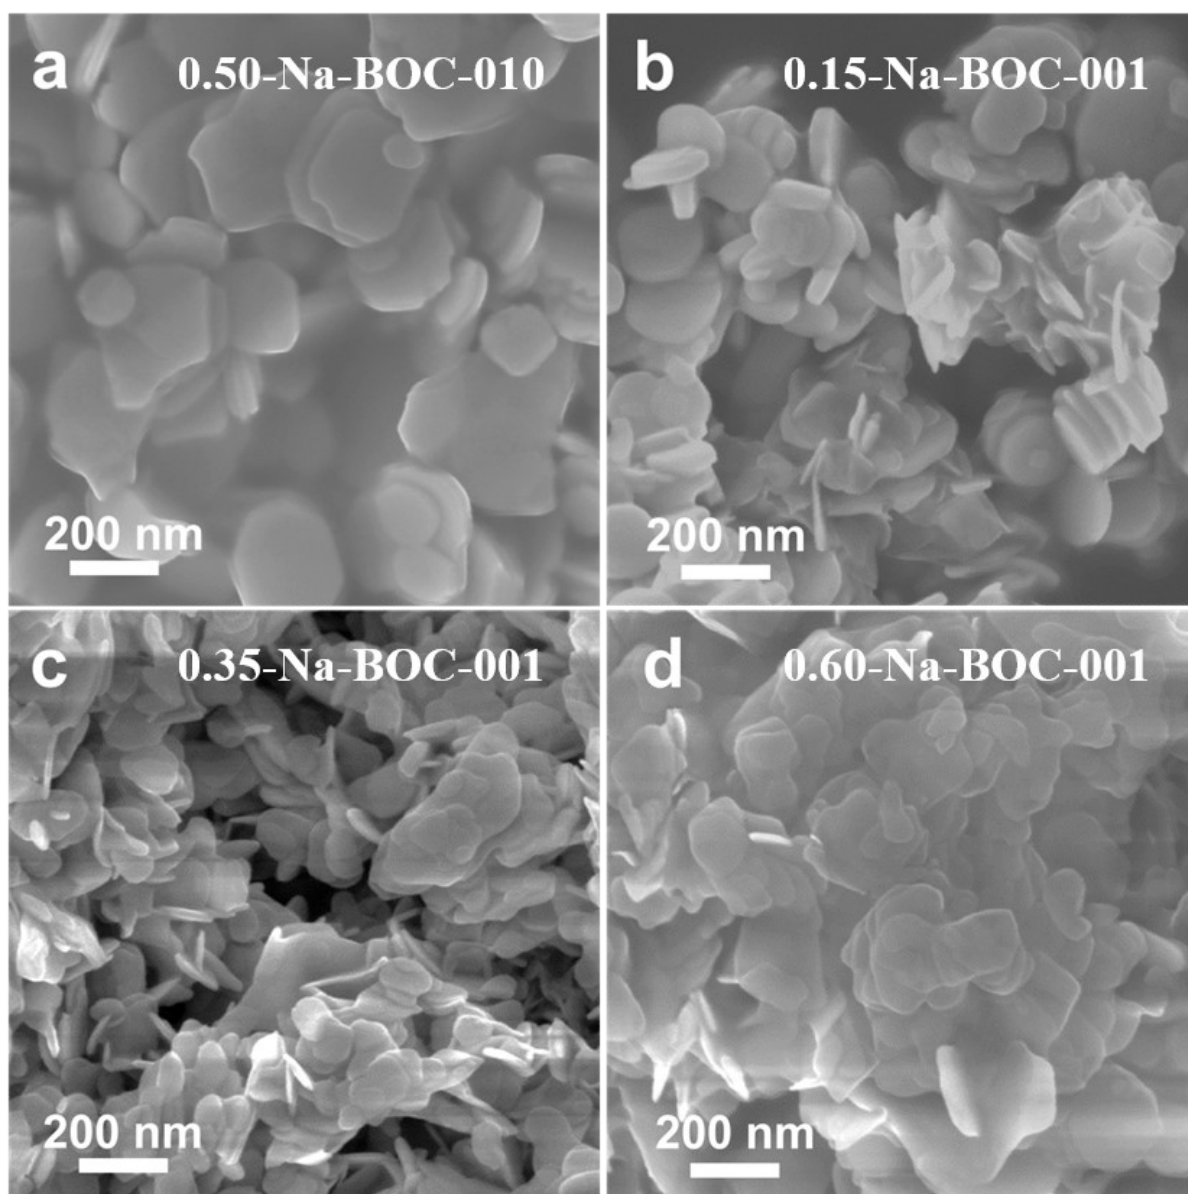

38

39 **Fig. S5.** SEM images of (a) 0.50-Na-BOC-010, (b) 0.15-Na-BOC-001, (c) 0.35-Na-BOC-001  
40 and (d) 0.60-Na-BOC-001.

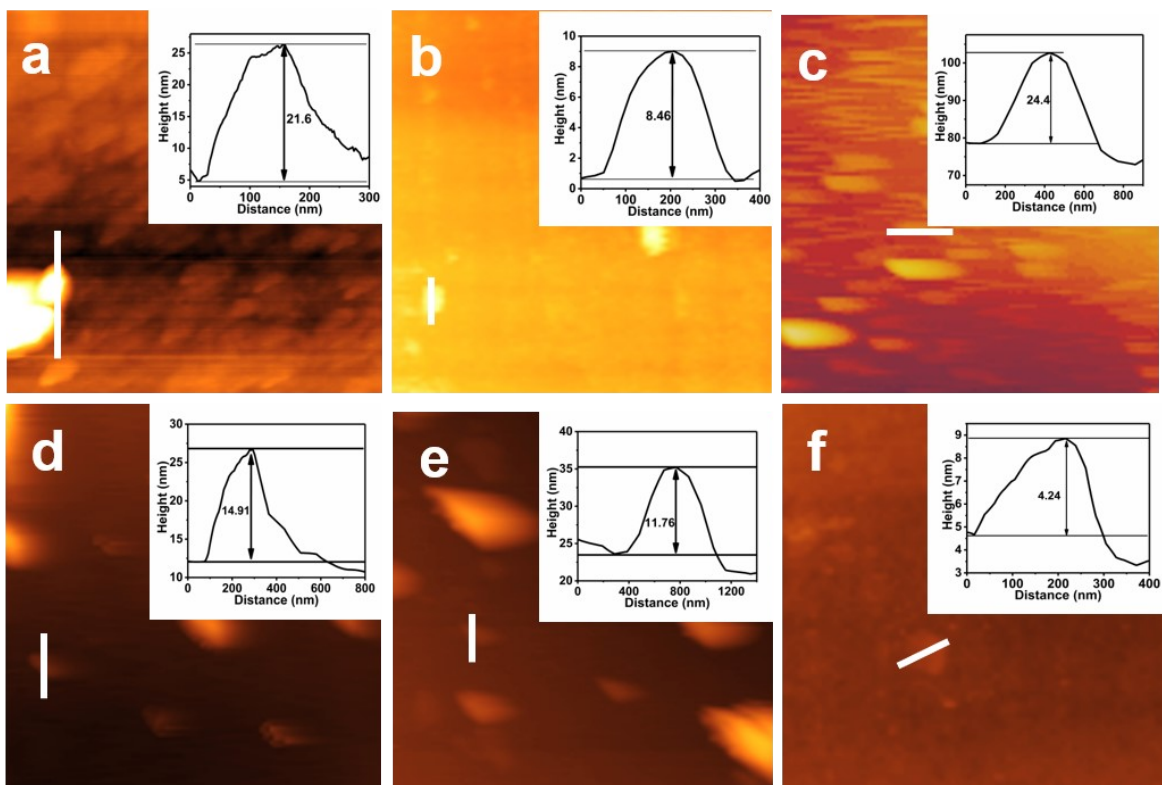

41

42 **Fig. S6.** AFM images and corresponding height profiles of (a) BOC-010, (b) BOC-001, (c)  
 43 0.50-Na-BOC-010, (d) 0.15-Na-BOC-001, (e) 0.35-Na-BOC-001 and 0.60-Na-BOC-001.

44

45

46

47

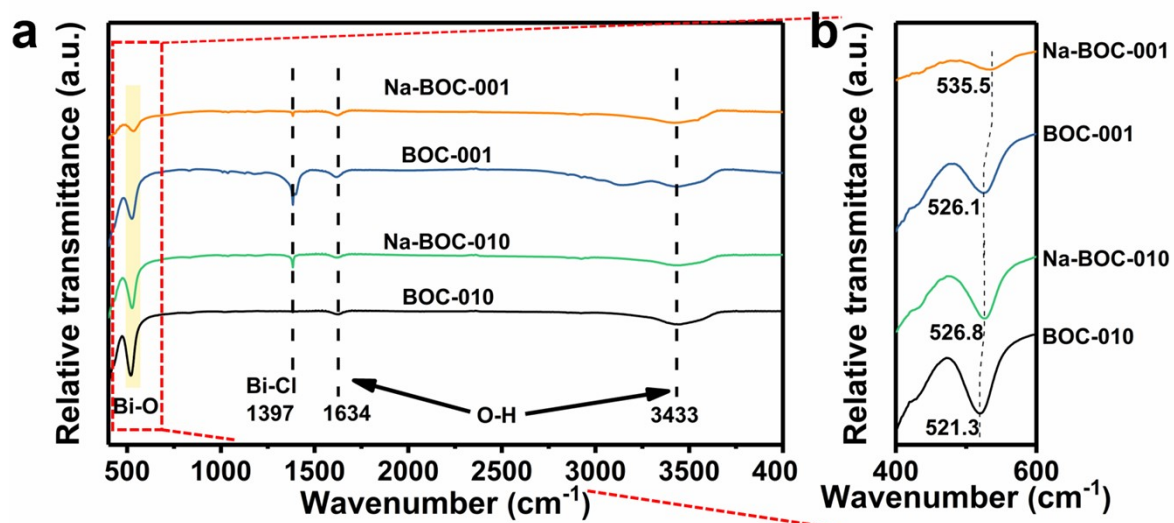

48

49 **Fig. S7.** FTIR spectra of BOC-010, Na-BOC-010, BOC-001 and Na-BOC-001 samples.

50

51

52

53

54

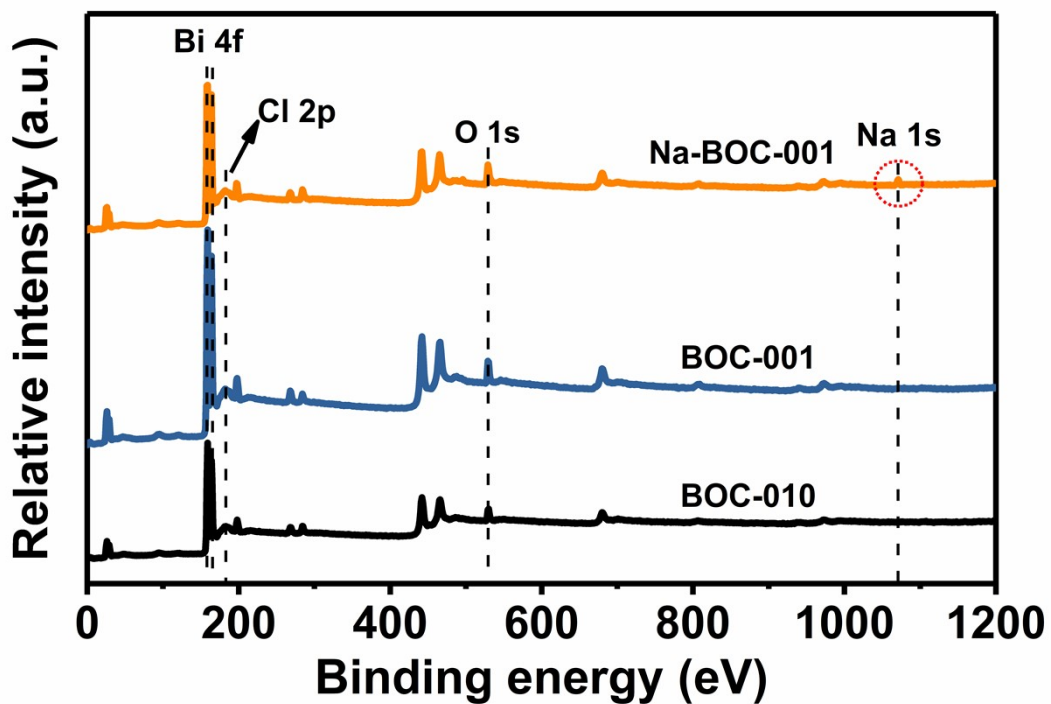

55

56

Fig. S8. Survey XPS spectra of BOC-010, BOC-001 and Na-BOC-001.

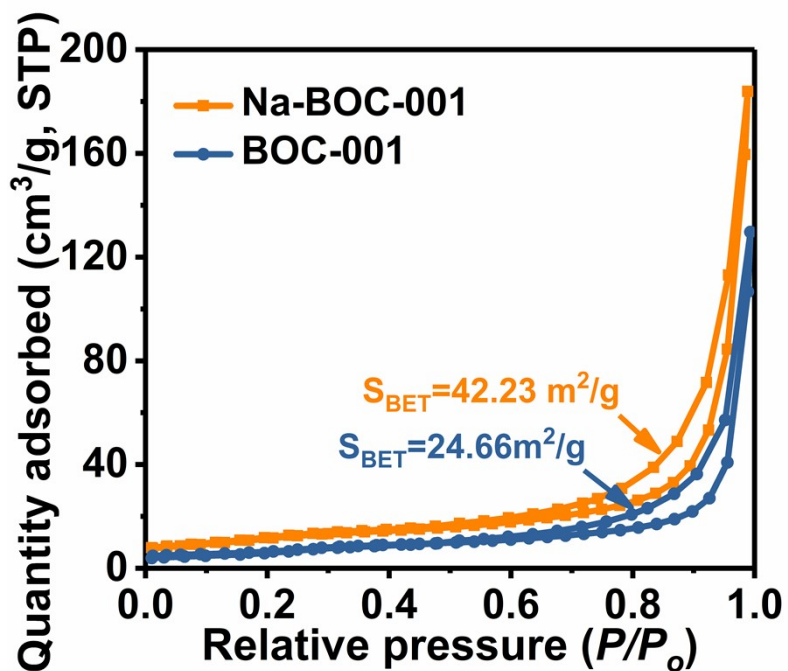

57

58

Fig. S9. N<sub>2</sub> adsorption and desorption isotherms of Na-BOC-001 and BOC-001.



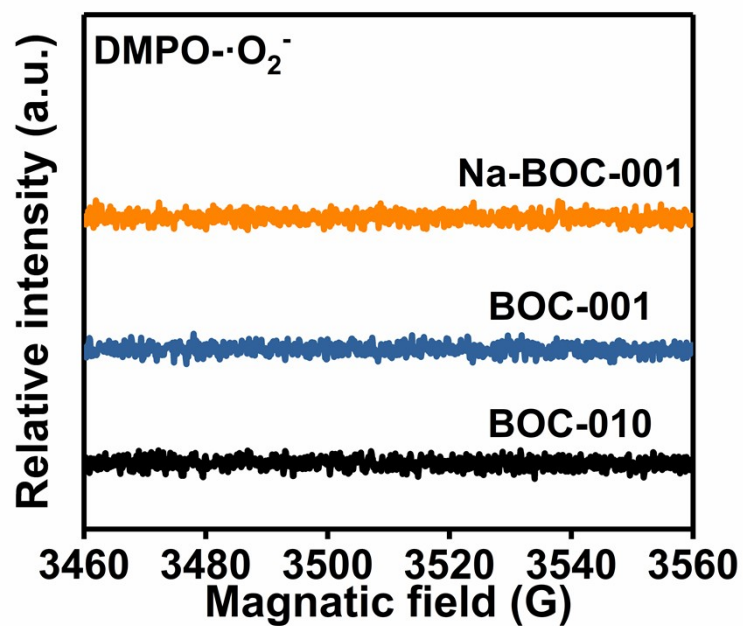

59

60 **Fig. S10.** ESR spectra of DMPO-•O<sub>2</sub><sup>-</sup> over BOC-010, BOC-001, and Na-BOC-001 under  
61 darkness.

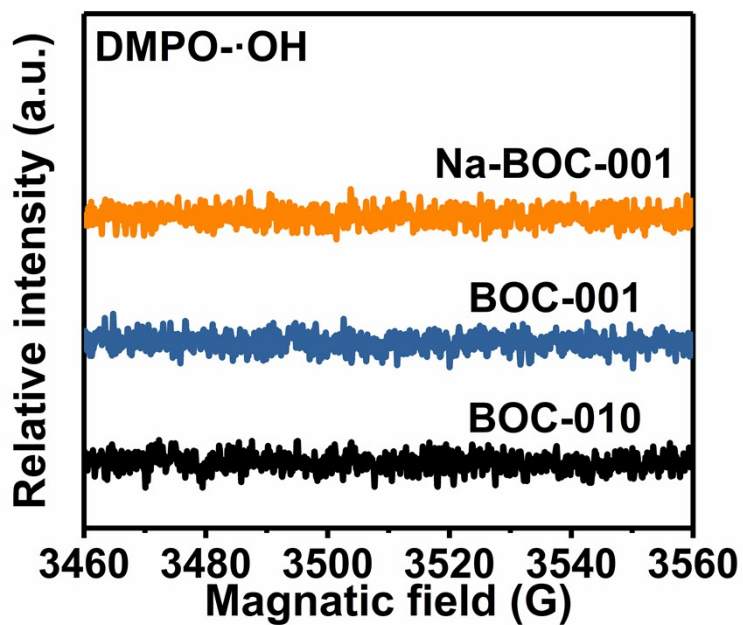

62

63 **Fig. S11.** ESR spectra of DMPO-•OH over BOC-010, BOC-001, and Na-BOC-001 under  
64 darkness.

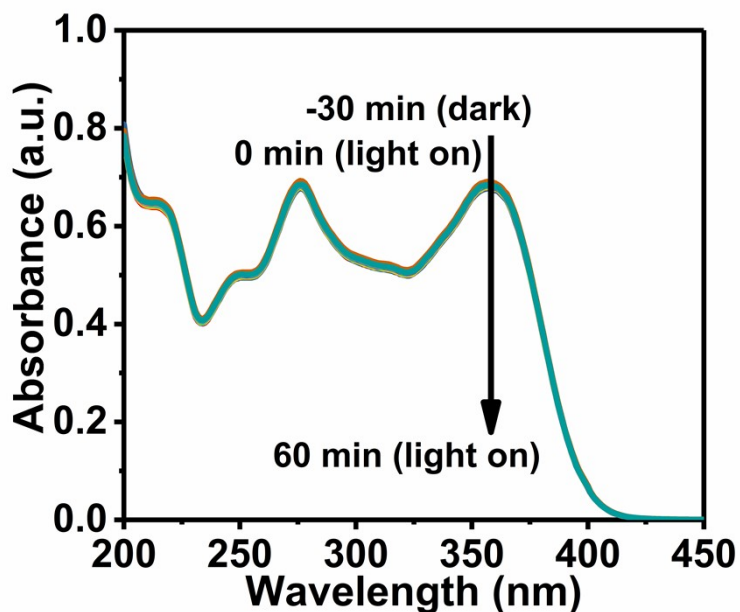

65

66 **Fig. S12.** UV-vis absorption spectra of TC collected during TC degradation process **without**  
 67 **catalyst** with irradiation time (Conditions: [TC] = 20 mg L<sup>-1</sup>, [catalyst] = 0 g L<sup>-1</sup>, pH = 6.5, T  
 68 = 25 °C, visible light ( $\lambda > 420$  nm)).

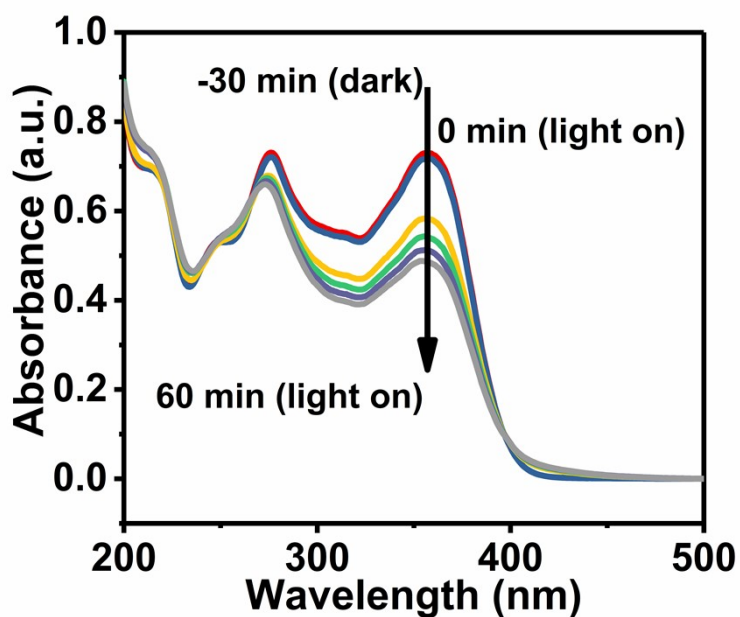

69

70 **Fig. S13.** UV-vis absorption spectra of TC collected during TC degradation process over  
 71 **BOC-010** with irradiation time. (Conditions: [TC] = 20 mg L<sup>-1</sup>, [catalyst] = 0.50 g L<sup>-1</sup>, pH =  
 72 6.5, T = 25 °C, visible light ( $\lambda > 420$  nm)).

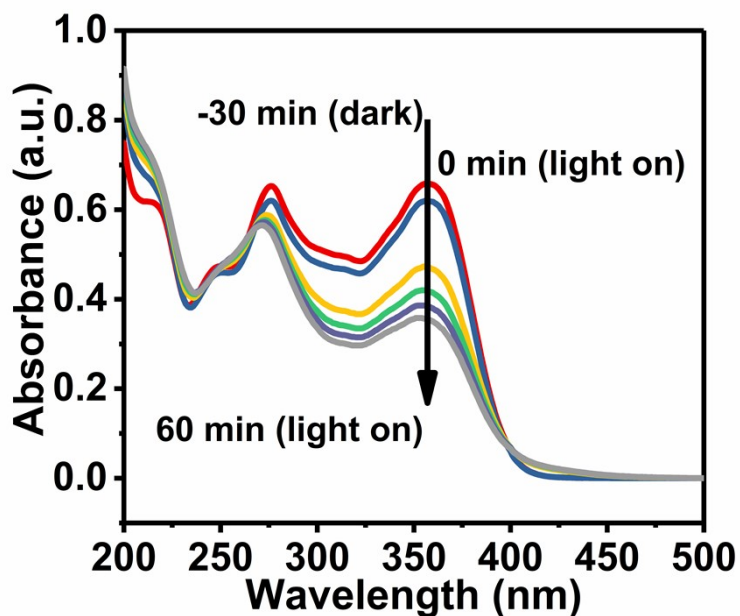

73

74 **Fig. S14.** UV-vis absorption spectra of TC collected during TC degradation process over Na-  
 75 **BOC-010** with irradiation time. (Conditions: [TC] = 20 mg L<sup>-1</sup>, [catalyst] = 0.50 g L<sup>-1</sup>, pH =  
 76 6.5, T = 25 °C, visible light ( $\lambda > 420$  nm)).

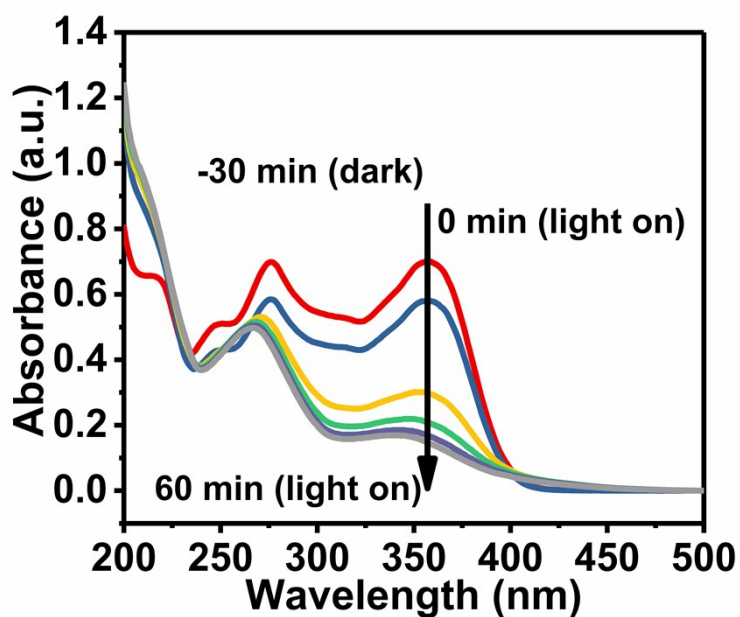

77

78 **Fig. S15.** UV-vis absorption spectra of TC collected during TC degradation process over  
 79 **BOC-001** with irradiation time. (Conditions: [TC] = 20 mg L<sup>-1</sup>, [catalyst] = 0.50 g L<sup>-1</sup>, pH =  
 80 6.5, T = 25 °C, visible light ( $\lambda > 420$  nm)).

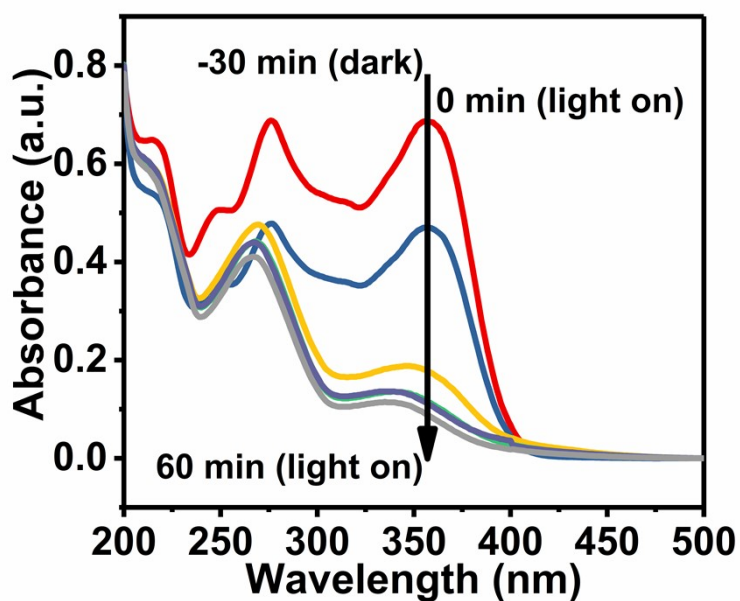

81

82 **Fig. S16.** UV-vis absorption spectra of TC collected during TC degradation process over Na-  
 83 **BOC-001** with irradiation time. (Conditions: [TC] = 20 mg L<sup>-1</sup>, [catalyst] = 0.50 g L<sup>-1</sup>, pH =  
 84 6.5, T = 25 °C, visible light ( $\lambda > 420$  nm)).

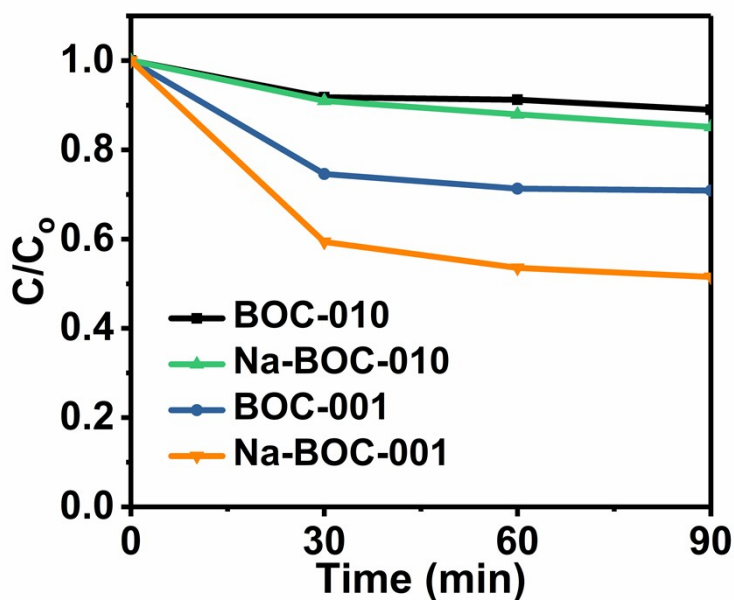

85

86 **Fig. S17.** TC adsorption profiles over the samples (BOC-010, Na-BOC-010, BOC-001 and  
 87 Na-BOC-001) under dark condition. (Conditions: [TC] = 20 mg L<sup>-1</sup>, [catalyst] = 0.50 g L<sup>-1</sup>,  
 88 pH = 6.5, T = 25 °C, visible light ( $\lambda > 420$  nm)).

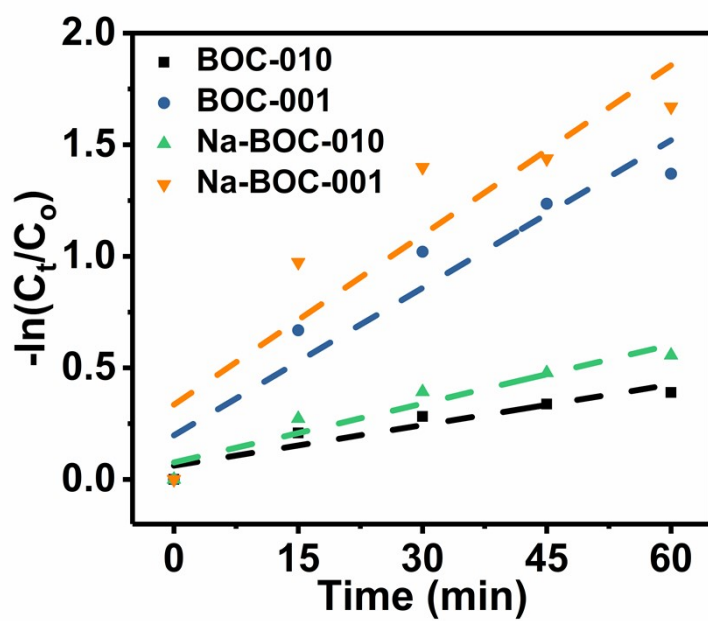

89

90 **Fig. S18.** Pseudo-first-order kinetic fitting curves and corresponding kinetic constants ( $k$ ) over  
 91 different samples under the irradiation of Vis light.

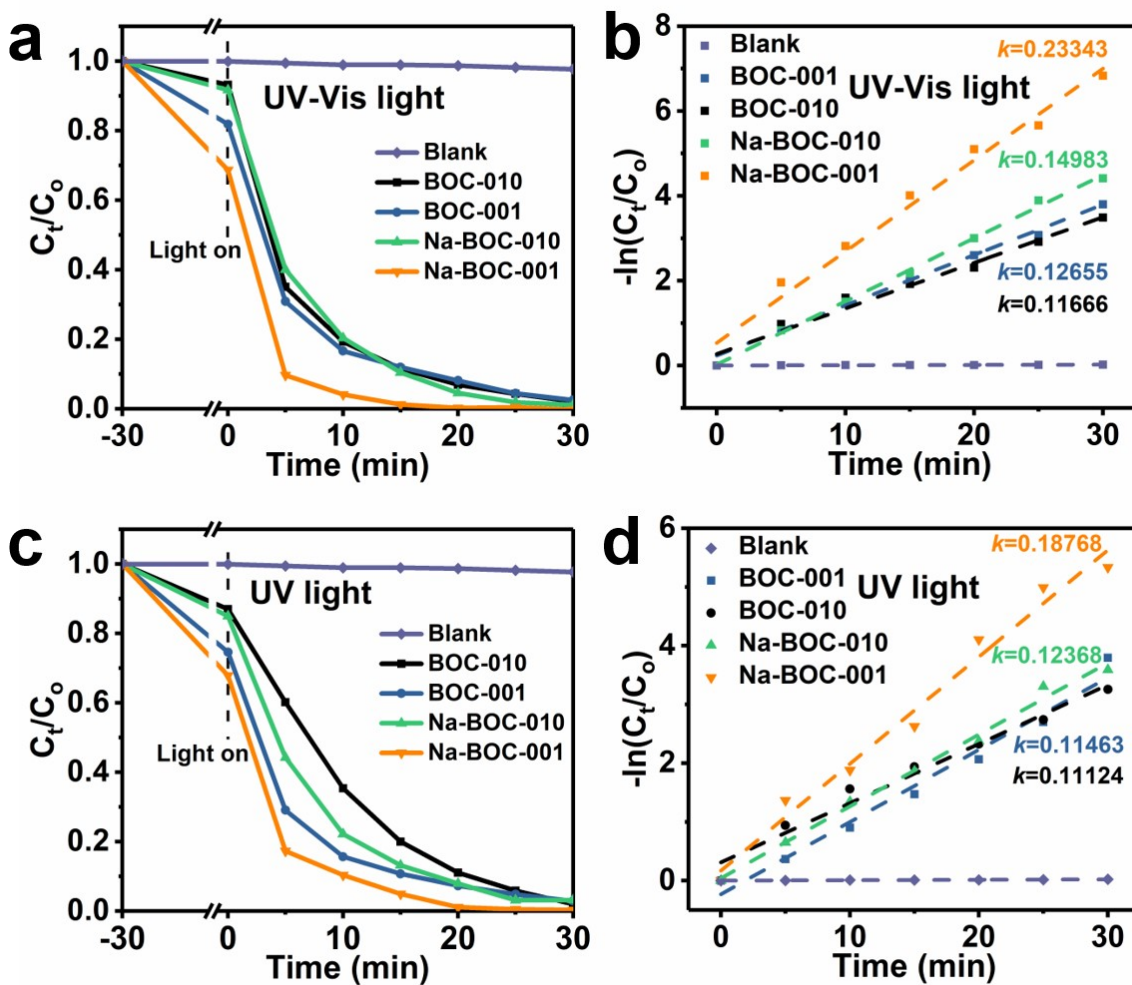

92

93 **Fig. S19.** (a) Photocatalytic degradation curves of TC and (b) Pseudo-first-order kinetic fitting curves and  
 94 corresponding kinetic constants ( $k$ ) over different samples under the irradiation of UV-Vis light. (c)  
 95 Photocatalytic degradation curves of TC and (d) Pseudo-first-order kinetic fitting curves and corresponding  
 96 kinetic constants ( $k$ ) over different samples under the irradiation of UV light. Conditions: [TC] = 20 mg L<sup>-1</sup>,  
 97 [catalyst] = 0.5 g L<sup>-1</sup>, pH = 6.5, T = 25 °C, UV-Vis light ( $\lambda > 320$  nm), UV light (320 <  $\lambda$  < 420 nm).

98

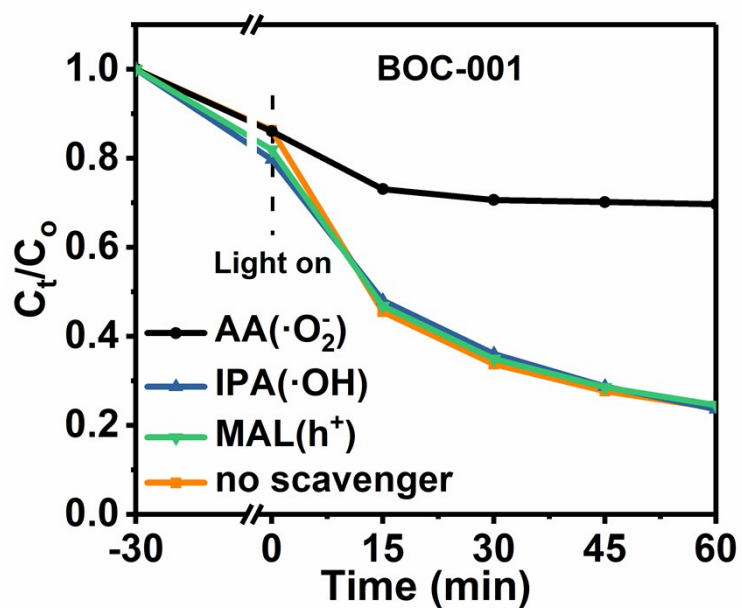

99

100 **Fig. S20.** TC removal profiles over **BOC-001** with addition of various radical sacrificial  
 101 agents. Conditions:  $[\text{TC}] = 20 \text{ mg L}^{-1}$ ,  $[\text{catalyst}] = 0.5 \text{ g L}^{-1}$ ,  $\text{pH} = 6.5$ ,  $T = 25 \text{ }^\circ\text{C}$ , visible light  
 102 ( $\lambda > 420 \text{ nm}$ ).

RT: 5.11 AV: 1 NL:3.20E6 C22H24O8N2 RDB: 12.5  
T: -cEIS Q1MS [64.000-500.000] Delta ppm: 2.478

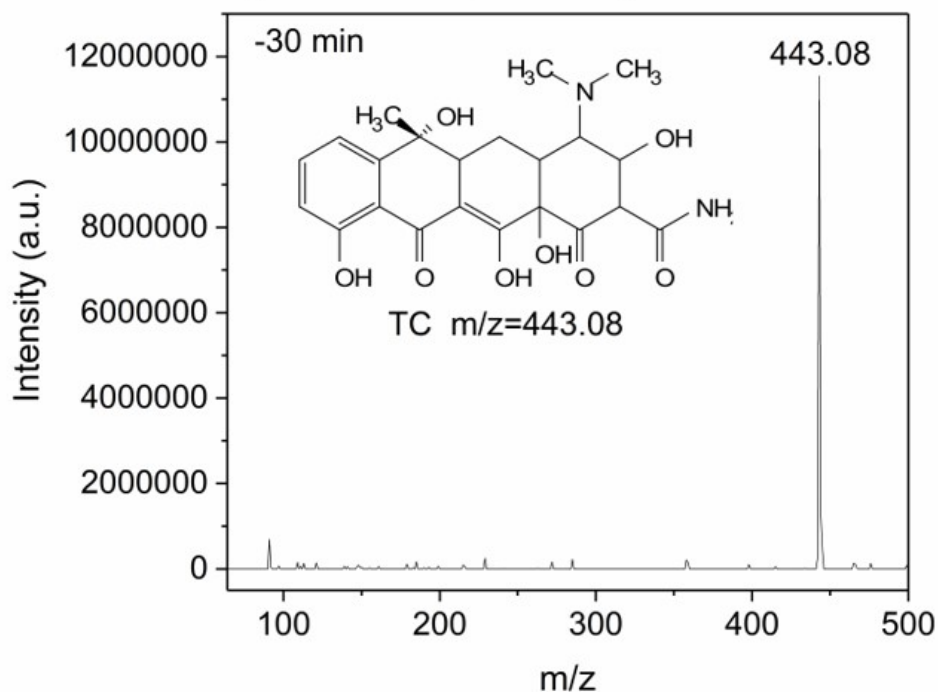

RT: 2.62 AV: 1 NL:4.53E5 C22H26N2O9 RDB: 12 Delta ppm: 0.003  
T: -cEIS Q1MS [64.000-500.000]

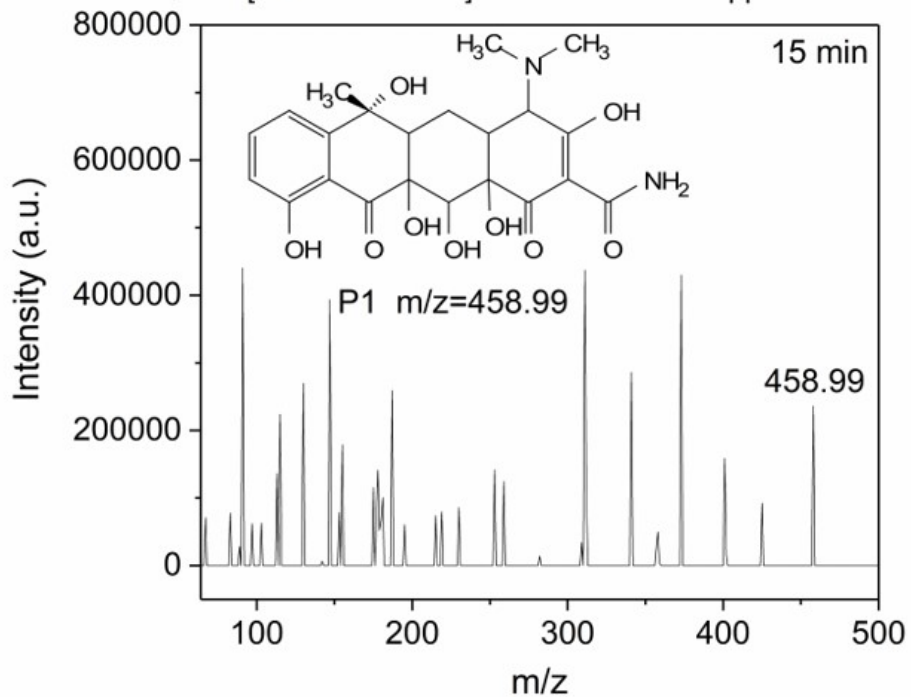

103

104 **Fig. S21.** MS spectra of identified **TC** and **P1** from solution collected during TC degradation  
105 process over Na-BOC-001 with different irradiation time.



RT: 3.84 AV: 1 NL:5.86E5 C22H23N1O8  
T: -cEIS Q1MS [64.000-500.000] RDB: 12.5 Delta ppm: 1.29

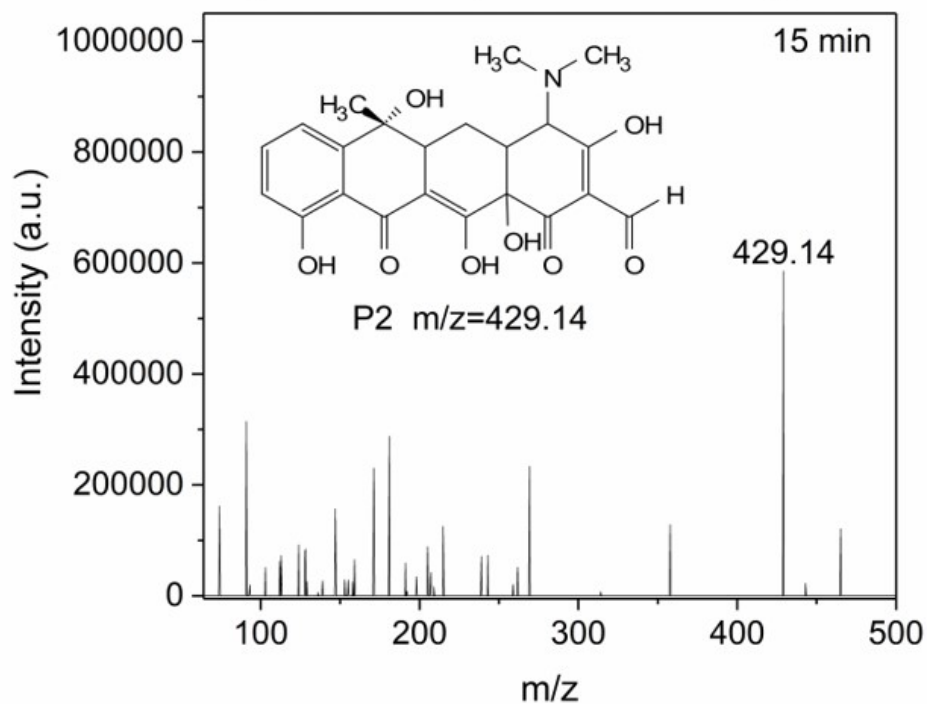

RT: 5.82 AV: 1 NL:2.90E5 C18H25O7N  
T: -cEIS Q1MS [64.000-500.000] RDB: 7.5 Delta ppm: 1.50

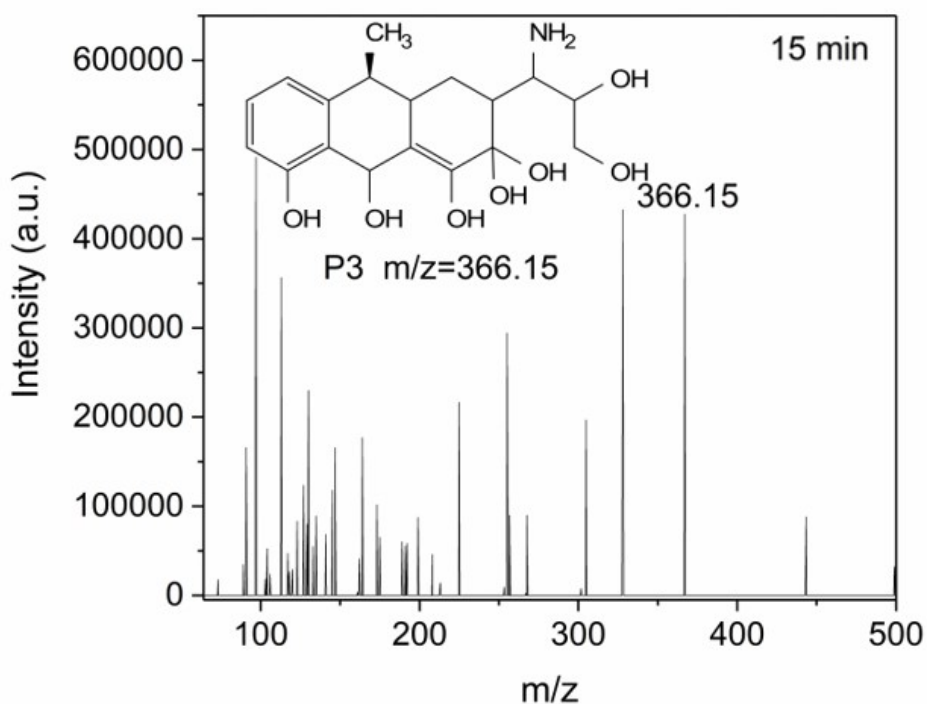

106

107 **Fig. S22.** MS spectra of identified **P2** and **P3** from solution collected during TC degradation  
108 process over Na-BOC-001 at irradiation time of 15 min.

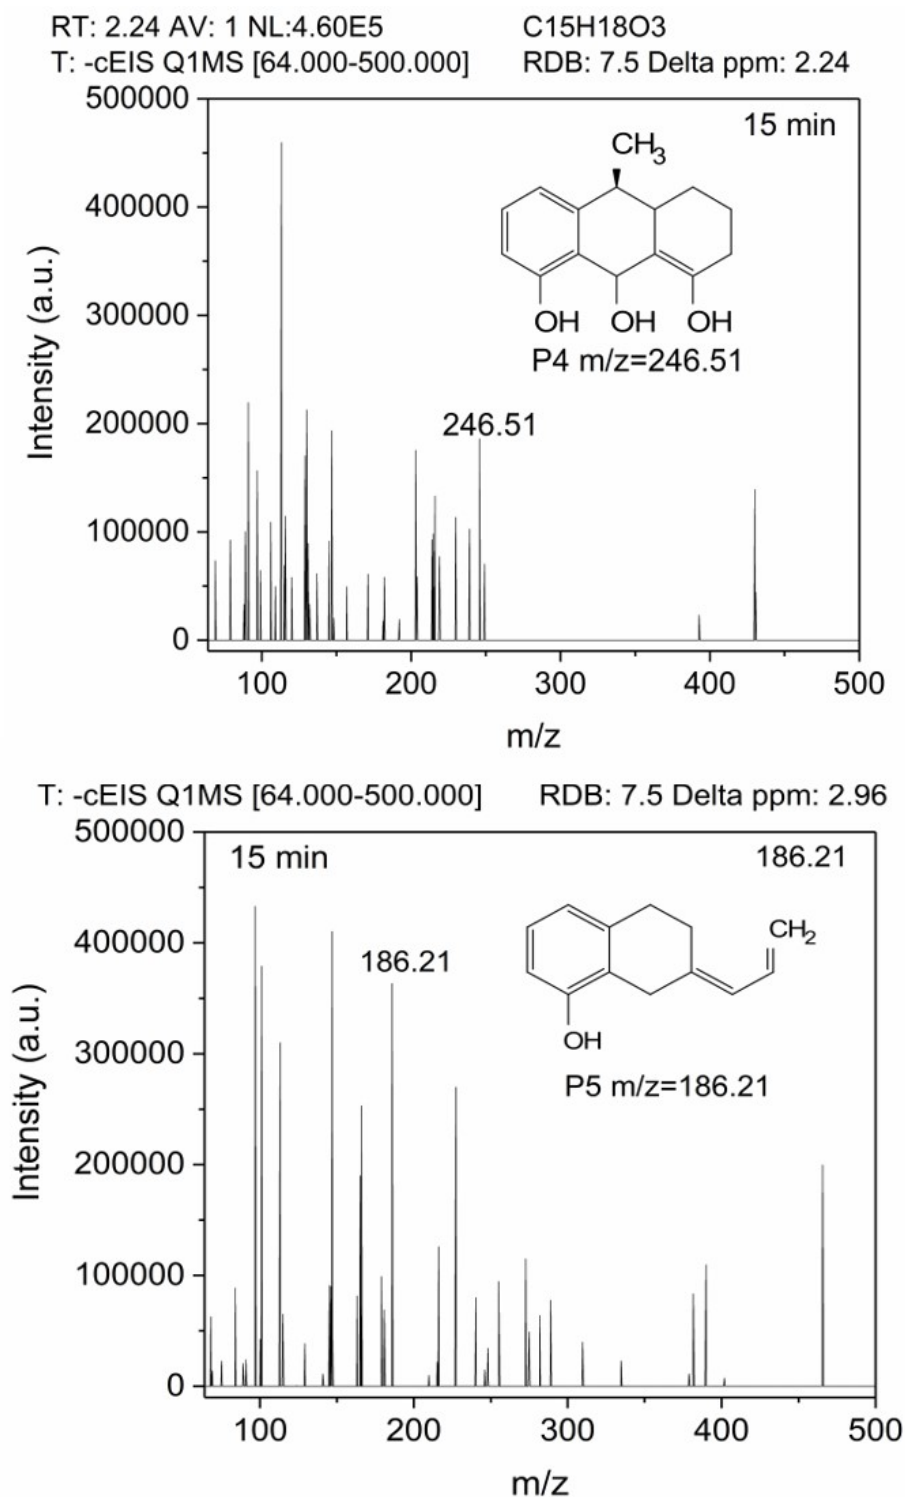

110

111 **Fig. S23.** MS spectra of identified **P4** and **P5** from solution collected during TC degradation  
112 process over Na-BOC-001 at irradiation time of 15 min.

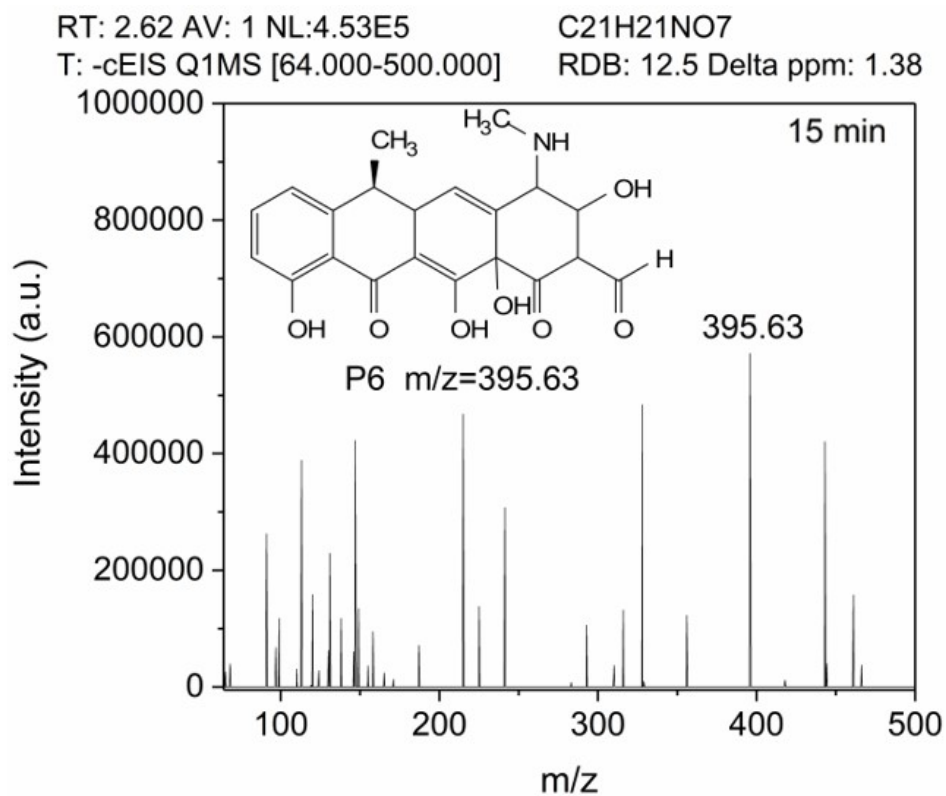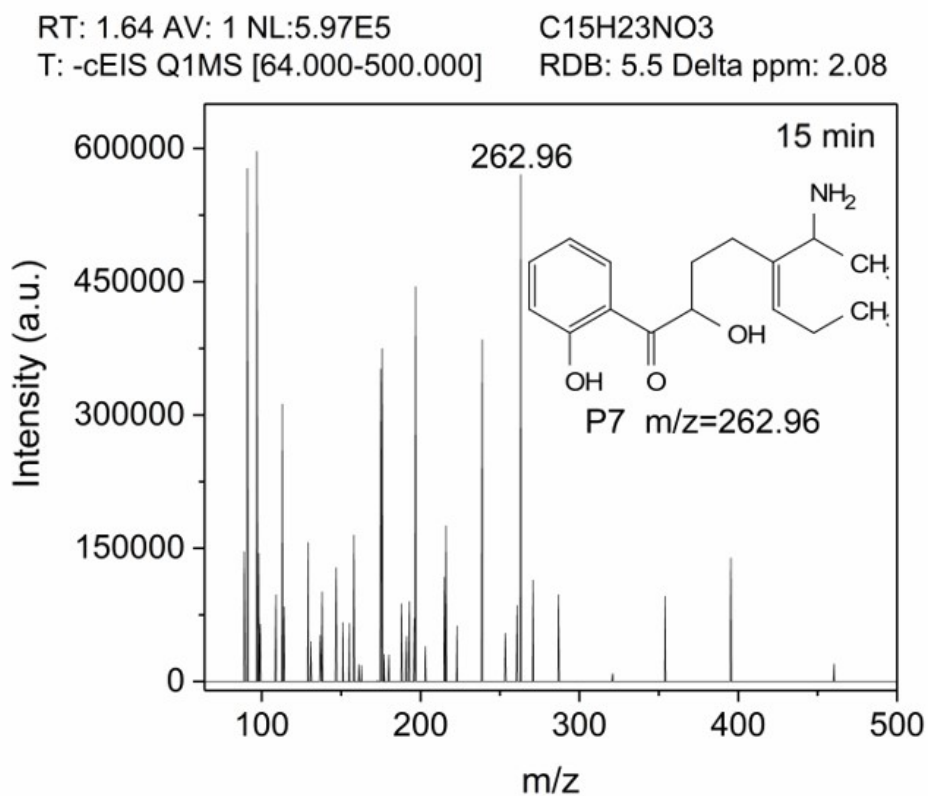

113

114 **Fig. S24.** MS spectra of identified **P6** and **P7** from solution collected during TC degradation

115

process over Na-BOC-001 at irradiation time of 15 min.

RT: 8.91 AV: 1 NL: 1.00E6 C7H14O  
T: -cEIS Q1MS [64.000-500.000] RDB: 1.0 Delta ppm: 0.03

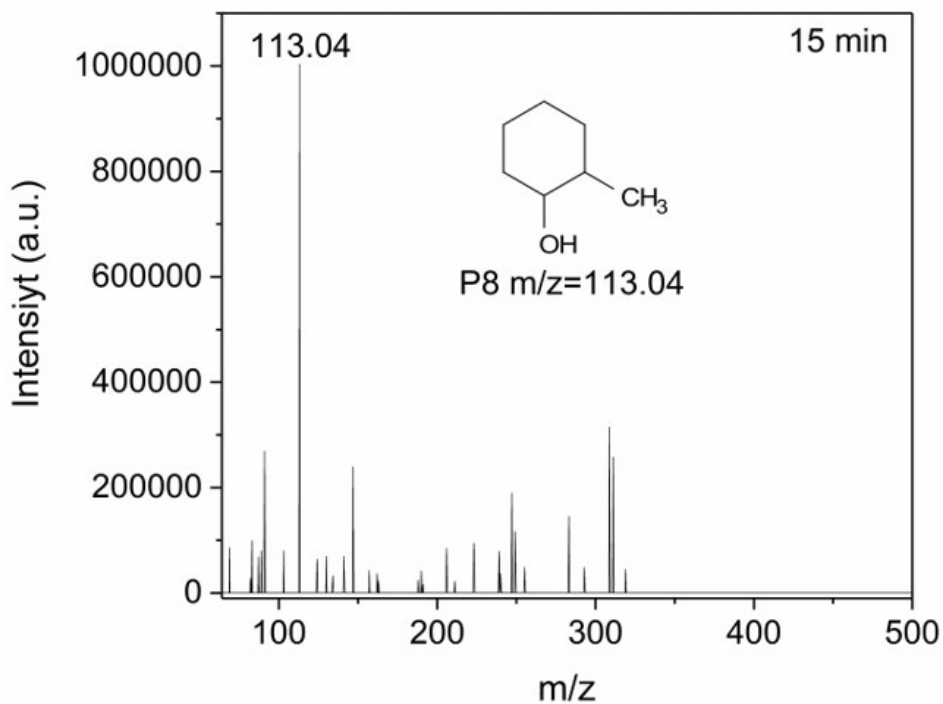

RT: 5.23 AV: 1 NL:3.32E5 C18H21O4N  
T: -cEIS Q1MS [64.000-500.000] RDB::15.5 Delta ppm: 1.61

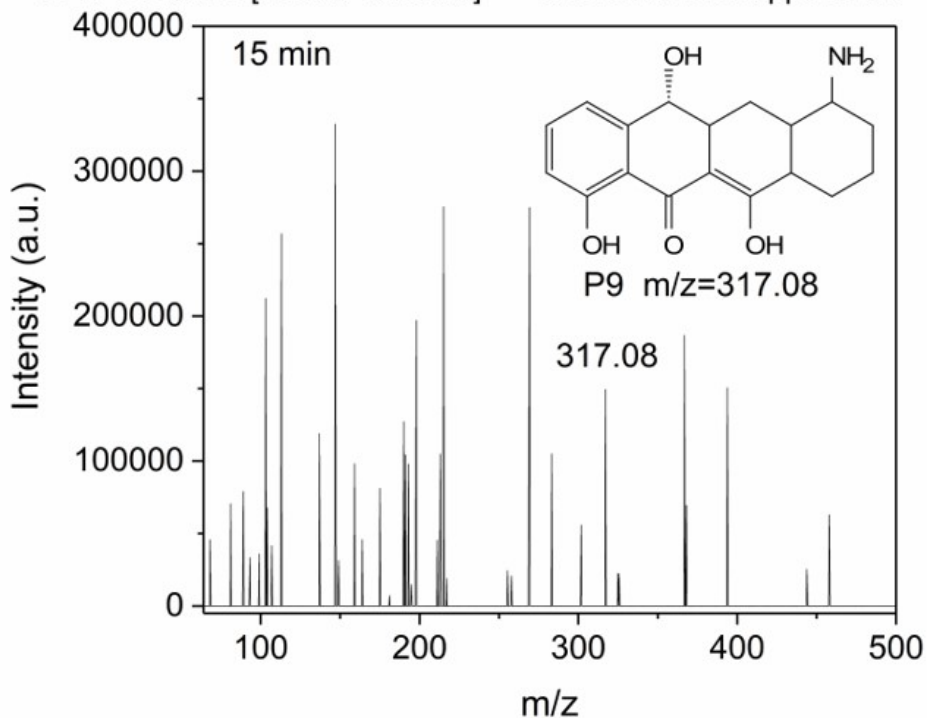

116

117 **Fig. S25.** MS spectra of identified **P8** and **P9** from solution collected during TC degradation

118

process over Na-BOC-001 at irradiation time of 15 min.

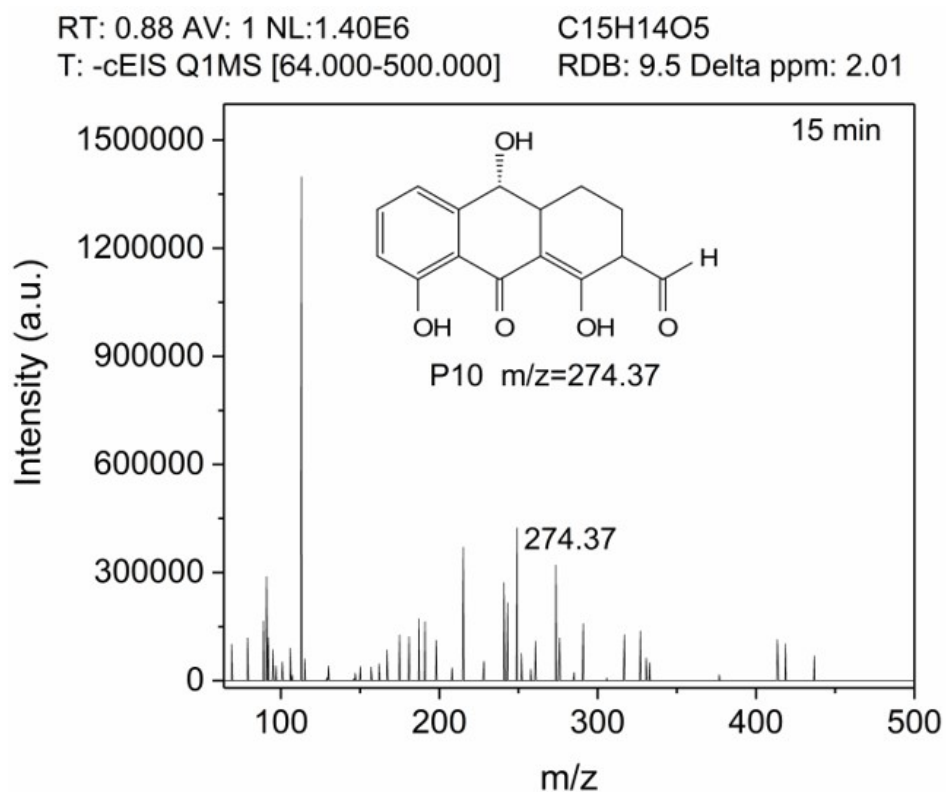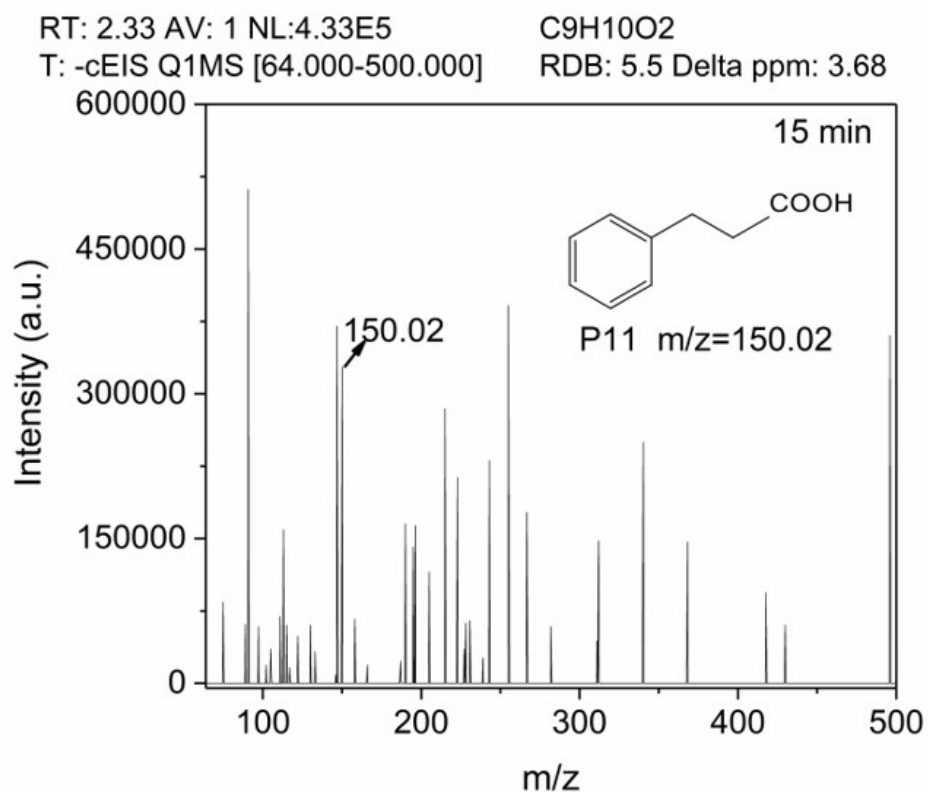

119

120

121

**Fig. S26.** MS spectra of identified **P10** and **P11** from solution collected during TC degradation process over Na-BOC-001 at irradiation time of 15 min.

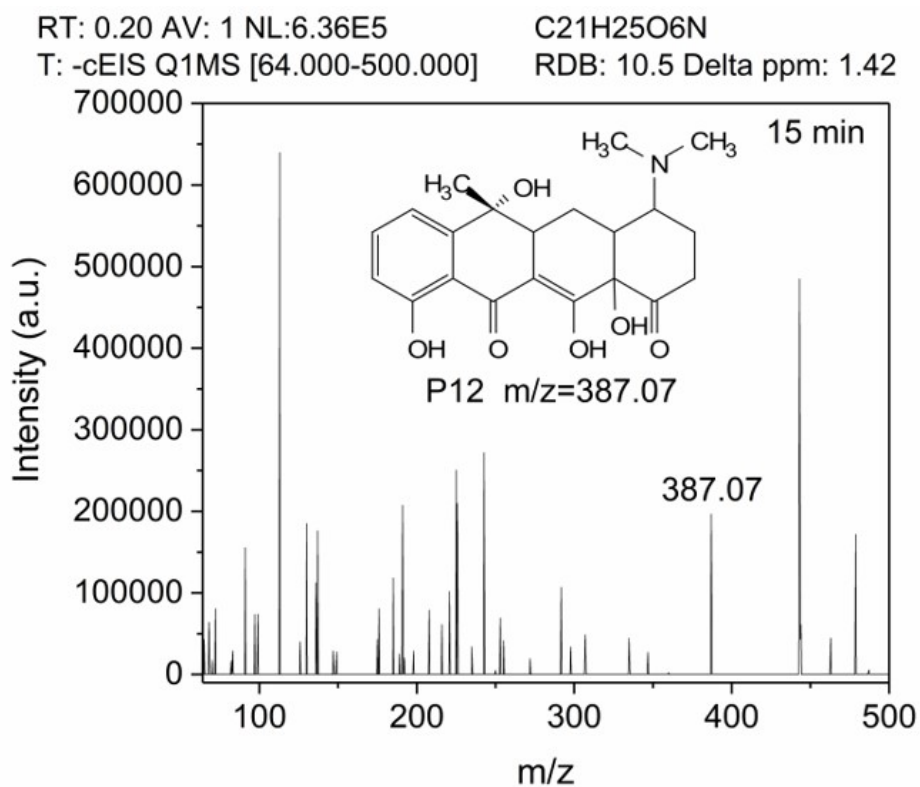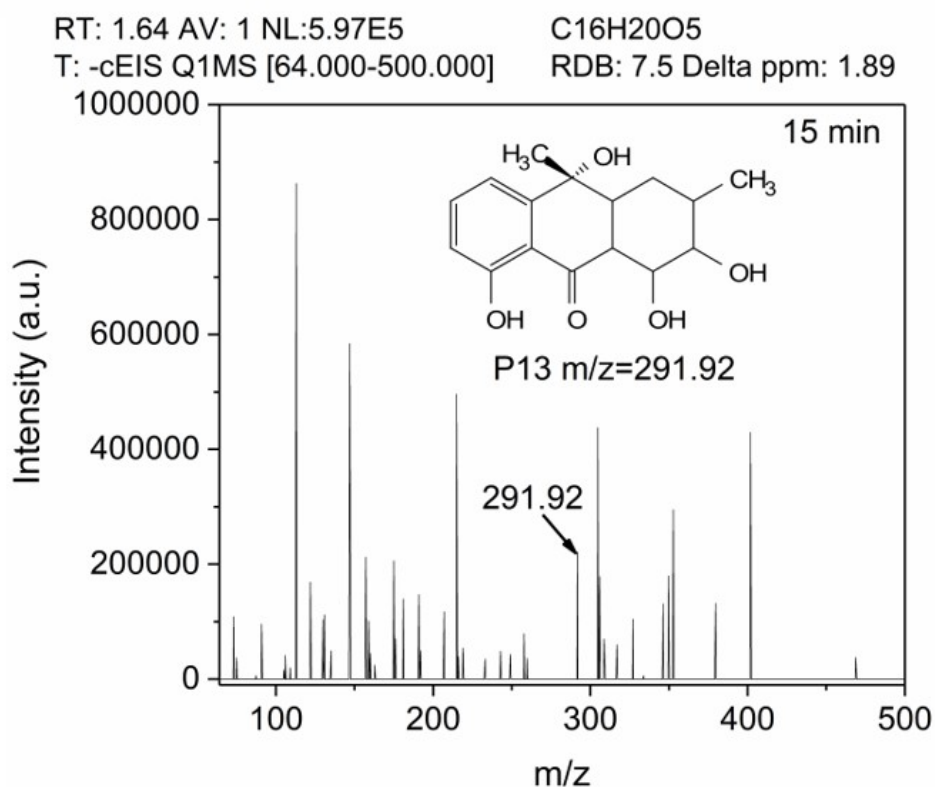

122

123

124

**Fig. S27.** MS spectra of identified **P12** and **P13** from solution collected during TC degradation process over Na-BOC-001 at irradiation time of 15 min.

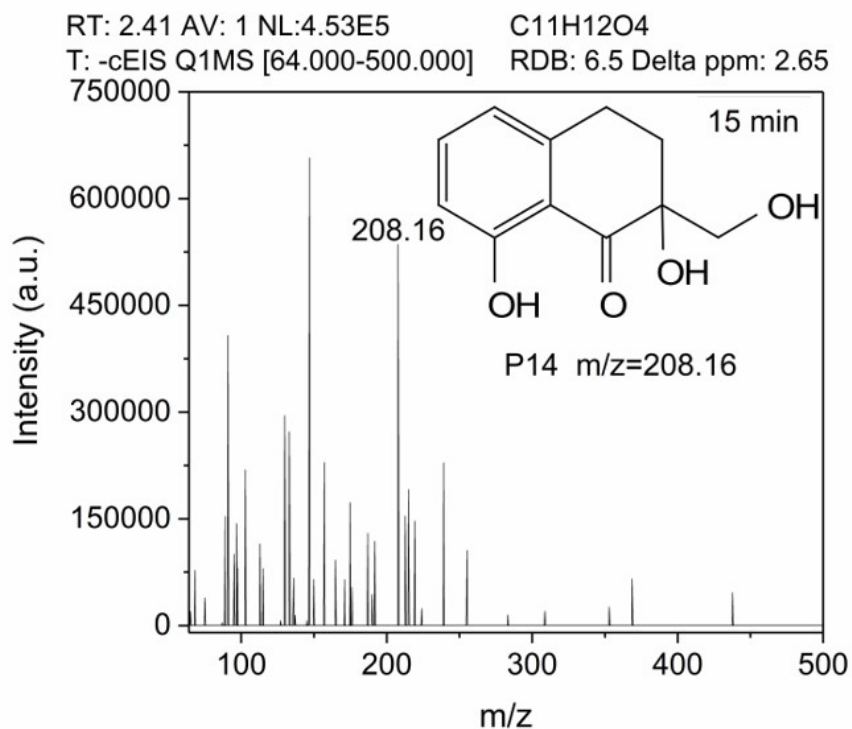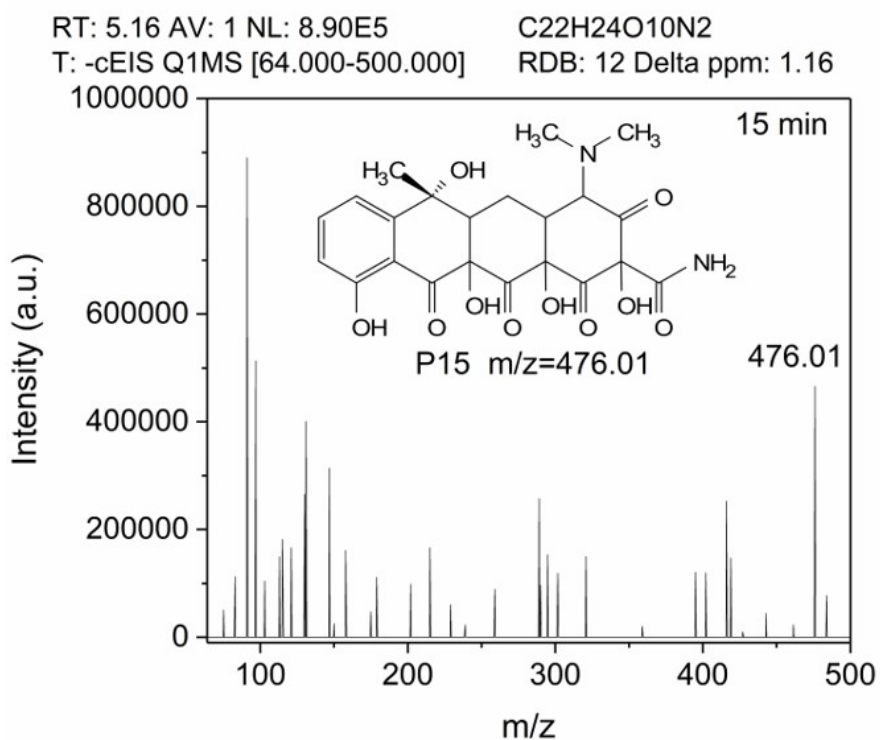

125

126

**Fig. S28.** MS spectra of identified **P14** and **P15** from solution collected during TC degradation process over Na-BOC-001 at irradiation time of 15 min.

127

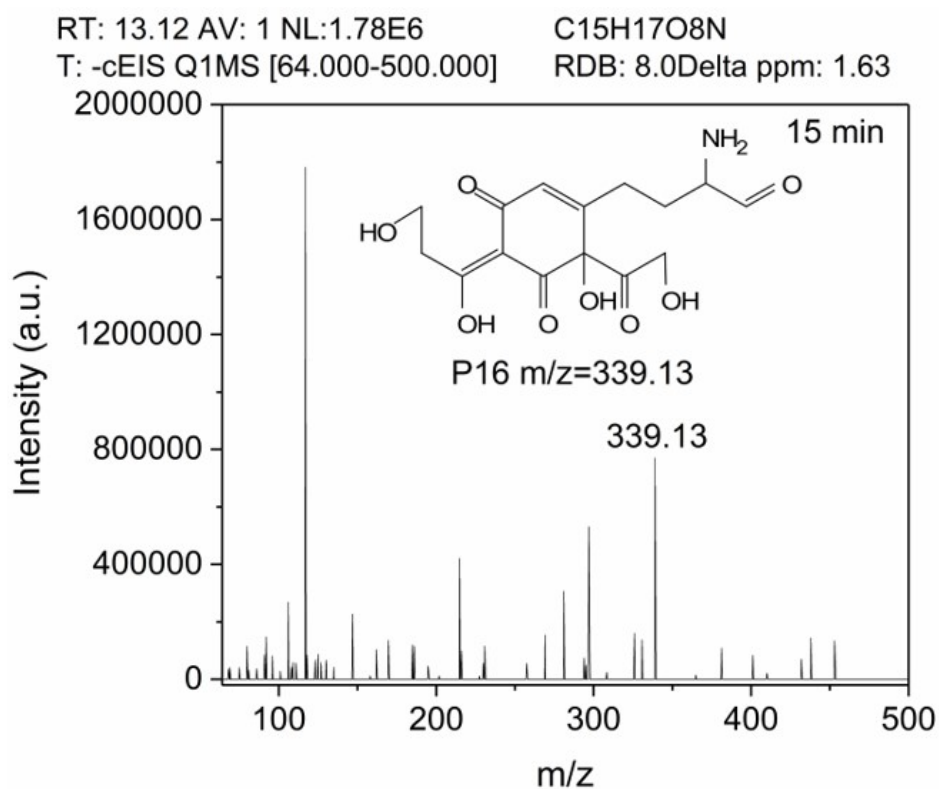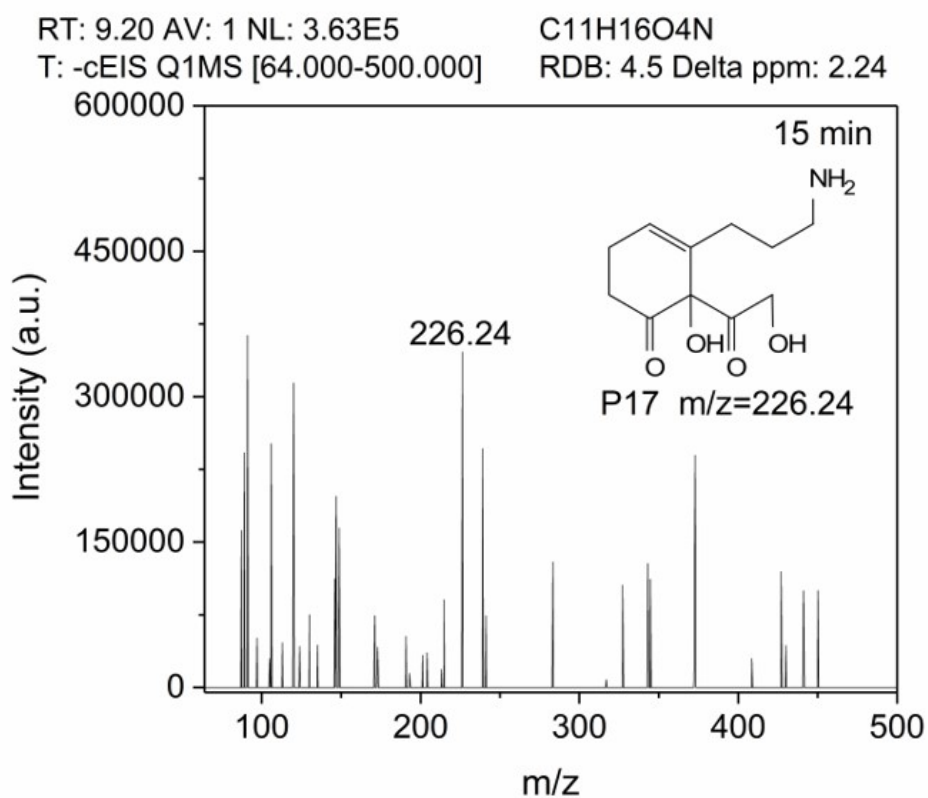

128

129

**Fig. S29.** MS spectra of identified **P16** and **P17** from solution collected during TC degradation process over Na-BOC-001 at irradiation time of 15 min.

130



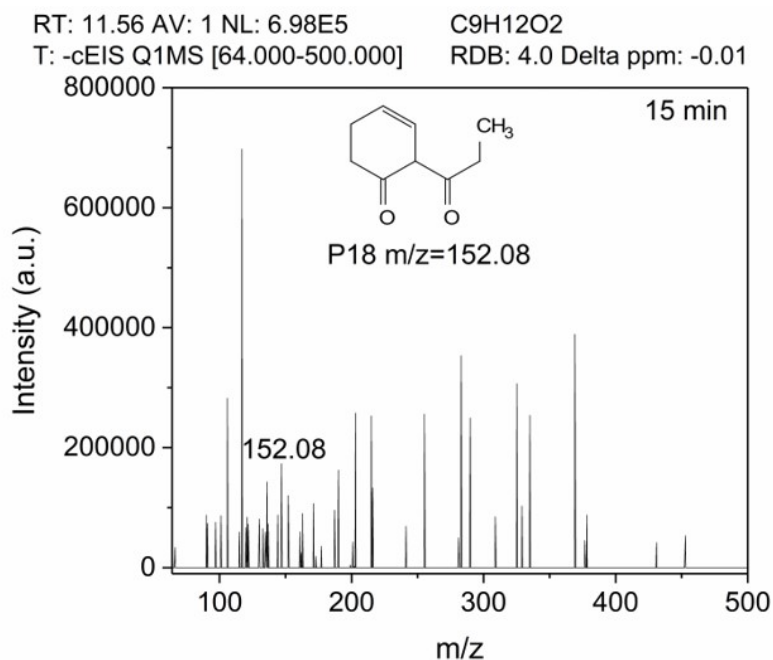

131

132 **Fig. S30.** MS spectra of identified **P18** from solution collected during TC degradation process  
133 over Na-BOC-001 at irradiation time of 15 min.

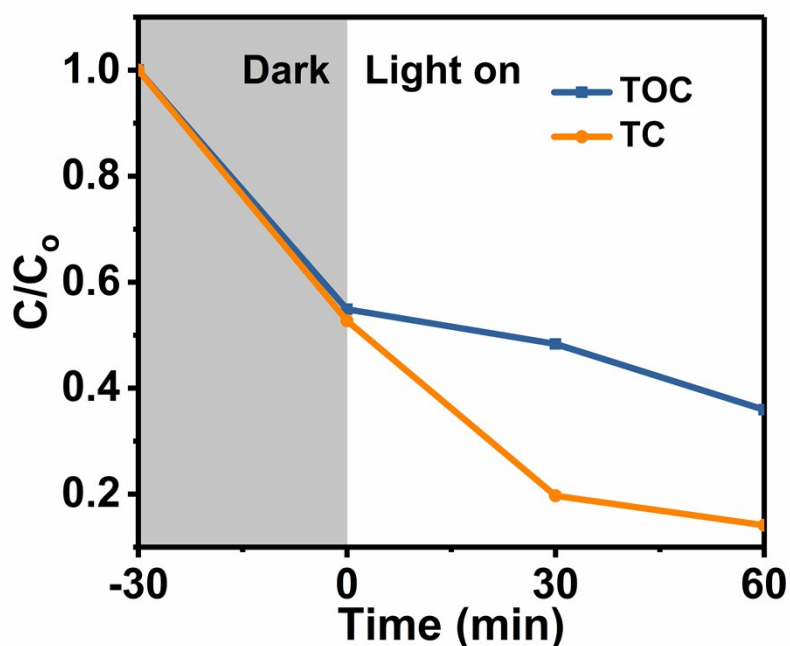

134

135 **Fig. S31.** TOC concentration and TC removal profiles in the TC solution versus time during  
136 the photocatalysis process over Na-BOC-001. Conditions: [TC] = 20 mg L<sup>-1</sup>, [catalyst] = 0.5 g  
137 L<sup>-1</sup>, pH = 6.5, T=25 °C, visible light ( $\lambda > 420$  nm).

138 **Table S1** Elemental composition of as-prepared samples detected by EDS.

| Sample          | Relative Content (at. %) |       |       |       | Na/Bi (%)   |
|-----------------|--------------------------|-------|-------|-------|-------------|
|                 | Na                       | Bi    | O     | Cl    |             |
| BOC-010         |                          | 11.71 | 76.47 | 11.81 |             |
| BOC-001         |                          | 22.16 | 58.91 | 18.93 |             |
| 0.50-Na-BOC-010 | 0.20                     | 6.77  | 86.44 | 6.59  | <b>2.95</b> |
| 0.15-Na-BOC-001 | 0.11                     | 8.45  | 83.26 | 8.18  | <b>1.30</b> |
| 0.35-Na-BOC-001 | 0.32                     | 12.16 | 76.73 | 10.79 | <b>2.63</b> |
| 0.50-Na-BOC-001 | 1.56                     | 26.77 | 48.79 | 21.87 | <b>5.83</b> |
| 0.60-Na-BOC-001 | 0.53                     | 10.39 | 79.22 | 9.86  | <b>5.10</b> |

139

140

141 **Table S2** Relative percent content of lattice oxygen, oxygen vacancy and surface adsorbed  
 142 oxygen peaks in the as-prepared samples by O 1s XPS spectral fitting.

| Sample     | Lattice oxygen ( $O_{\alpha}$ ) |       |                        | Oxygen vacancy ( $O_{\beta}$ ) |       |                       | Surface adsorbed oxygen ( $O_{\varepsilon}$ ) |       |                             |
|------------|---------------------------------|-------|------------------------|--------------------------------|-------|-----------------------|-----------------------------------------------|-------|-----------------------------|
|            | Peak (eV)                       | Area  | * $O_{\alpha}/O_T$ (%) | Peak (eV)                      | Area  | * $O_{\beta}/O_T$ (%) | Peak (eV)                                     | Area  | * $O_{\varepsilon}/O_T$ (%) |
| BOC-010    | 529.9                           | 44140 | 71.0                   | 531.3                          | 11295 | 18.2                  | 533.1                                         | 6721  | 10.8                        |
| BOC-001    | 529.9                           | 86677 | 75.3                   | 531.3                          | 19399 | 16.9                  | 533.1                                         | 8914  | 7.8                         |
| Na-BOC-001 | 529.7                           | 70814 | 70.9                   | 531.1                          | 6986  | 7.0                   | 532.7                                         | 22042 | 22.1                        |

143 \*  $O_T = O_{\alpha} + O_{\beta} + O_{\varepsilon}$

144

145

146 **Table S3** Kinetic fitting data of TC degradation over as-prepared samples under the  
 147 irradiation of UV-Vis light.

| Samples    | Kinetic Equation     | Kinetics Rate<br>( $k$ , min <sup>-1</sup> ) * | R <sup>2</sup> |
|------------|----------------------|------------------------------------------------|----------------|
| BOC-010    | $y=0.27303+0.10756x$ | 0.11666                                        | 0.97839        |
| BOC-001    | $y=0.23589+0.11869x$ | 0.12655                                        | 0.98763        |
| Na-BOC-010 | $y=0.02439+0.14902x$ | 0.14983                                        | 0.99751        |
| Na-BOC-001 | $y=0.53512+0.21560x$ | 0.23343                                        | 0.98061        |

148  $*\ln(C_0/C_t)=k_{app}t$  <sup>1</sup>

149

150 **Table S4** Kinetic fitting data of TC degradation over as-prepared samples under the  
 151 irradiation of UV light.

| Samples    | Kinetic Equation     | Kinetics Rate<br>( $k$ , min <sup>-1</sup> ) * | R <sup>2</sup> |
|------------|----------------------|------------------------------------------------|----------------|
| BOC-010    | $y=0.31041+0.10089x$ | 0.11124                                        | 0.96718        |
| BOC-001    | $y=0.31041+0.10089x$ | 0.11463                                        | 0.97752        |
| Na-BOC-010 | $y=0.04282+0.12225x$ | 0.12368                                        | 0.99253        |
| Na-BOC-001 | $y=0.17090+0.18198x$ | 0.18768                                        | 0.98114        |

152  $*\ln(C_0/C_t)=k_{app}t$  <sup>1</sup>

153

154

155

156

157 **Table S5** Kinetic fitting data of TC degradation over as-prepared samples under the  
 158 irradiation of Vis light.

| Samples    | Kinetic Equation     | Kinetics Rate<br>( $k$ , min <sup>-1</sup> )* | R <sup>2</sup> |
|------------|----------------------|-----------------------------------------------|----------------|
| BOC-010    | $y=0.06176+0.00605x$ | 0.00708                                       | 0.89510        |
| BOC-001    | $y=0.19743+0.02205x$ | 0.02534                                       | 0.90903        |
| Na-BOC-010 | $y=0.07620+0.00878x$ | 0.01005                                       | 0.92054        |
| Na-BOC-001 | $y=0.33510+0.02536x$ | 0.03095                                       | 0.82498        |

159 \* $\ln(C_0/C_t)=k_{app}t$  <sup>1</sup>

160

161

162 **Table S6** Kinetic fitting data of TC degradation over as-prepared samples.

| Photocatalysts                                                    | Contaminant | Light sources | Dosage (g L <sup>-1</sup> ) | C <sub>0</sub> (mg L <sup>-1</sup> ) | Volume (mL) | Time (min) | Degradation rates (%) | Ref.      |
|-------------------------------------------------------------------|-------------|---------------|-----------------------------|--------------------------------------|-------------|------------|-----------------------|-----------|
| Na-BOC-001                                                        | TC          | Vis           | 0.5                         | 20                                   | 100         | 60         | 87.2                  | This work |
| WO <sub>3</sub> /Bi <sub>12</sub> O <sub>17</sub> Cl <sub>2</sub> | TC          | Vis           | 0.8                         | 20                                   | 80          | 180        | 63.2                  | 1         |
| BiOCl/CAU-17                                                      | TC          | Xenon         | 0.1                         | 10                                   | 100         | 90         | 85.5                  | 2         |
| NH <sub>2</sub> -MIL-125 (Ti)/BiOCl                               | TC          | Vis           | 0.5                         | 20                                   | 100         | 120        | 78.0                  | 3         |
| P-BiOCl                                                           | TC          | Xenon         | 0.5                         | 20                                   | 100         | 30         | 81.0                  | 4         |

163

## 164 References

- 165 1 J. Zheng, F. Chang, M. Jiao, Q. Xu, B. Deng and X. Hu, *J. Colloid Interface Sci.*, 2018,  
 166 **510**, 20-31.  
 167 2 F. Zhang, X. Xiao and Y. Xiao, *Dalton Trans.*, 2022, **51**, 10992-11004.  
 168 3 Q. Hu, J. Di, B. Wang, M. Ji, Y. Chen, J. Xia, H. Li and Y. Zhao, *Appl. Surf. Sci.*, 2019,

169 **466**, 525-534.

170 4 J. Cao, W. Cen, Y. Jing, Z. Du, W. Chu and J. Li, *Chem. Eng. J.*, 2022, **435**, 134683.

171
